# Supplementary material for: Integrating endometrial proteomic and single cell transcriptomic pipelines reveals distinct menstrual cycle and endometriosis-associated molecular profiles
Source: bioRxiv or medRxiv preprint supplement (doi:10.1101/2022.01.29.22269829), 2022-02-01

A

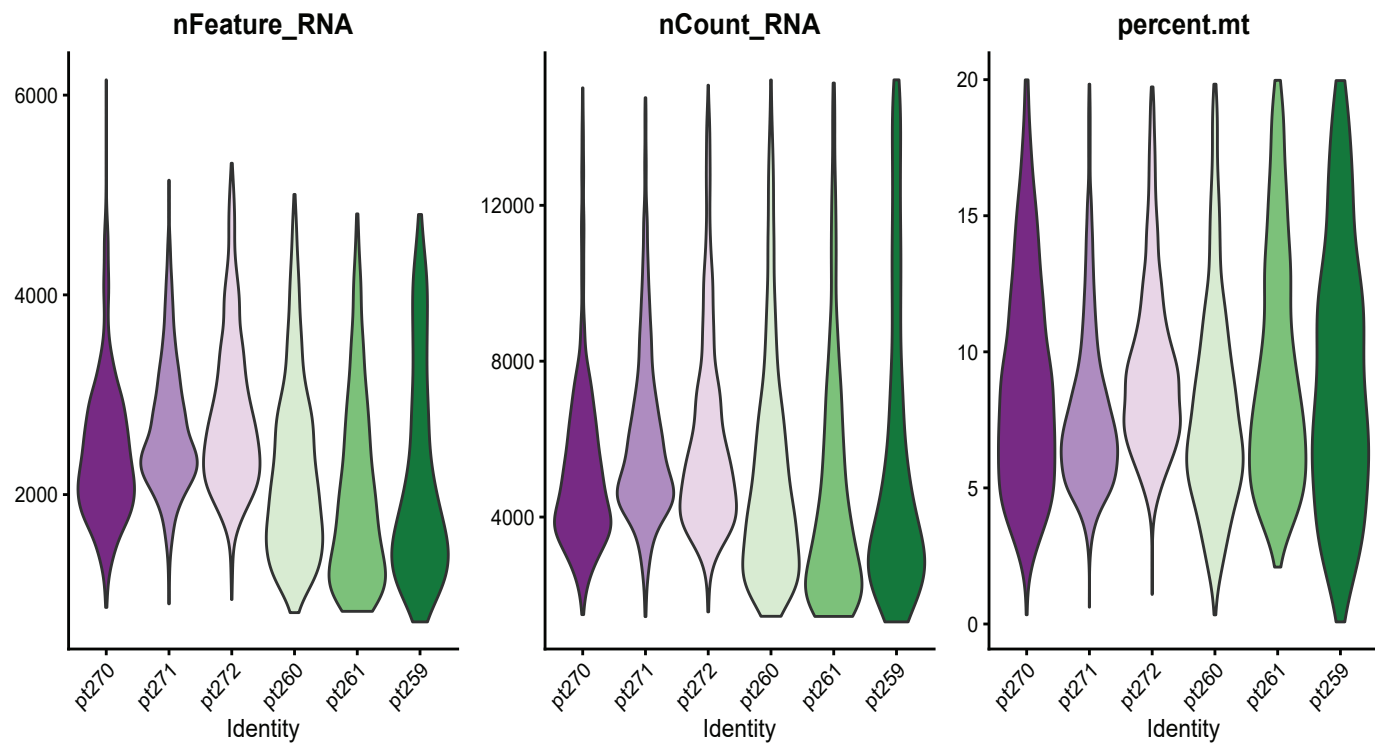

B

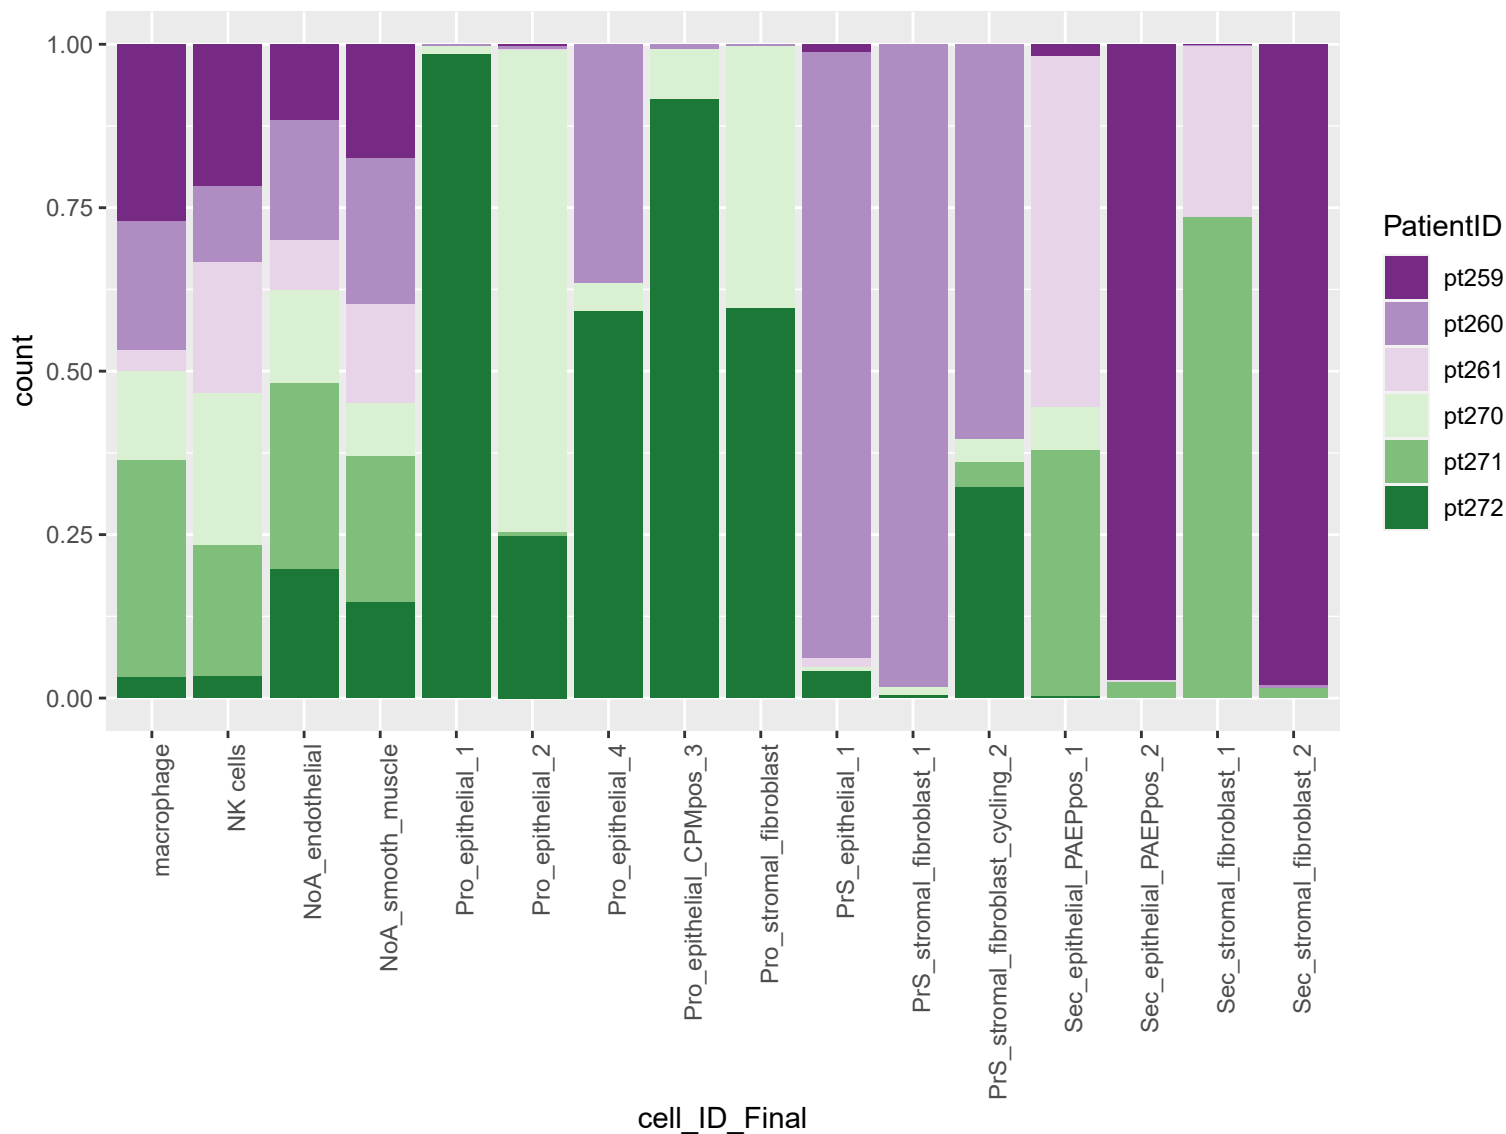

Supplement: Supplementary file [file media-1.pdf]
